# Supplementary material
Source: HighWire-hosted journal article supplement (https://www.jneurosci.org/highwire/filestream/599770/field_highwire_adjunct_files/5/Table_S1.pdf)
Supplement: Table_S1.pdf [file Table_S1.pdf]

## Supplemental Table 1.

### Lists of binasal (E-E) and ipsi-nasal (E-0, E-I) neurons in each rat

| AON neurons |       |                  |                                     |                            |                                          | OB neurons |                  |                  |
|-------------|-------|------------------|-------------------------------------|----------------------------|------------------------------------------|------------|------------------|------------------|
| Rats        | Cells | E-E, E-0 type    | ※ <sup>1</sup><br>Ipsi. v.s. Contra | ※ <sup>2</sup><br>Boost-up | ※ <sup>3</sup><br>Matching number (0-10) | Rats       | Cells            | E-E, E-0 type    |
| #1          | 1     | Binasal (E-E)    | [ I ] > [ C ]                       | n.d.                       | 8                                        | #24        | 1                | ipsi-nasal (E-0) |
|             | 2     | Binasal (E-E)    | [ I ] > [ C ]                       | n.d.                       | 8                                        |            | 2                | ipsi-nasal (E-0) |
|             | 3     | Binasal (E-E)    | [ I ] ≐ [ C ]                       | n.d.                       | 10                                       |            | 3                | ipsi-nasal (E-0) |
| #2          | 1     | Binasal (E-E)    | [ I ] < [ C ]                       | n.d.                       | 10                                       | 4          | ipsi-nasal (E-0) |                  |
|             | 2     | Binasal (E-E)    | [ I ] ≐ [ C ]                       | n.d.                       | 10                                       | 5          | ipsi-nasal (E-0) |                  |
|             | 3     | ipsi-nasal (E-0) | n.d.                                | n.d.                       | n.d.                                     | 6          | ipsi-nasal (E-0) |                  |
|             | 4     | n.d.             | n.d.                                | Y                          | n.d.                                     | 7          | ipsi-nasal (E-0) |                  |
|             | 5     | Binasal (E-E)    | [ I ] > [ C ]                       | Y                          | 9                                        | #25        | 1                | ipsi-nasal (E-0) |
|             | 6     | Binasal (E-E)    | [ I ] > [ C ]                       | n.d.                       | 6                                        |            | 2                | ipsi-nasal (E-0) |
| #3          | 1     | Binasal (E-E)    | [ I ] > [ C ]                       | Y                          | 9                                        | 3          | ipsi-nasal (E-0) |                  |
|             | 2     | ipsi-nasal (E-0) | n.d.                                | N                          | n.d.                                     | 4          | ipsi-nasal (E-0) |                  |
| #4          | 1     | Binasal (E-E)    | [ I ] ≐ [ C ]                       | N                          | n.d.                                     | 5          | ipsi-nasal (E-0) |                  |
|             | 2     | ipsi-nasal (E-0) | n.d.                                | n.d.                       | n.d.                                     | 6          | ipsi-nasal (E-0) |                  |
| #5          | 1     | ipsi-nasal (E-0) | n.d.                                | N                          | n.d.                                     | 7          | ipsi-nasal (E-0) |                  |
|             | 2     | ipsi-nasal (E-0) | n.d.                                | N                          | n.d.                                     | 8          | ipsi-nasal (E-0) |                  |
|             | 3     | Binasal (E-E)    | [ I ] > [ C ]                       | Y                          | 8                                        | 9          | ipsi-nasal (E-0) |                  |
|             | 4     | Binasal (E-E)    | [ I ] < [ C ]                       | n.d.                       | 8                                        | 10         | ipsi-nasal (E-0) |                  |
| #6          | 1     | ipsi-nasal (E-0) | n.d.                                | N                          | n.d.                                     | 11         | ipsi-nasal (E-0) |                  |
| #7          | 1     | Binasal (E-E)    | [ I ] > [ C ]                       | Y                          | n.d.                                     | 12         | ipsi-nasal (E-0) |                  |
|             | 2     | Binasal (E-E)    | [ I ] ≐ [ C ]                       | Y                          | n.d.                                     | 13         | ipsi-nasal (E-0) |                  |
| #8          | 1     | Binasal (E-E)    | [ I ] > [ C ]                       | Y                          | n.d.                                     | 14         | ipsi-nasal (E-0) |                  |
|             | 2     | Binasal (E-E)    | [ I ] > [ C ]                       | N                          | n.d.                                     |            |                  |                  |
|             | 3     | Binasal (E-E)    | [ I ] > [ C ]                       | Y                          | n.d.                                     |            |                  |                  |
|             | 4     | Binasal (E-E)    | [ I ] > [ C ]                       | N                          | n.d.                                     |            |                  |                  |
| #9          | 1     | Binasal (E-E)    | [ I ] > [ C ]                       | N                          | n.d.                                     |            |                  |                  |
|             | 2     | ipsi-nasal (E-0) | n.d.                                | N                          | n.d.                                     |            |                  |                  |
| #10         | 1     | Binasal (E-E)    | [ I ] > [ C ]                       | N                          | n.d.                                     |            |                  |                  |
| #11         | 1     | ipsi-nasal (E-I) | n.d.                                | n.d.                       | n.d.                                     |            |                  |                  |
|             | 2     | ipsi-nasal (E-0) | n.d.                                | N                          | n.d.                                     |            |                  |                  |
|             | 3     | ipsi-nasal (E-0) | n.d.                                | N                          | n.d.                                     |            |                  |                  |
| #12         | 1     | Binasal (E-E)    | [ I ] > [ C ]                       | N                          | n.d.                                     |            |                  |                  |
|             | 2     | ipsi-nasal (E-I) | n.d.                                | n.d.                       | n.d.                                     |            |                  |                  |
| #13         | 1     | ipsi-nasal (E-0) | n.d.                                | N                          | n.d.                                     |            |                  |                  |
|             | 2     | n.d.             | n.d.                                | N                          | n.d.                                     |            |                  |                  |
| #14         | 1     | Binasal (E-E)    | [ I ] > [ C ]                       | N                          | n.d.                                     |            |                  |                  |
| #15         | 1     | ipsi-nasal (E-0) | n.d.                                | n.d.                       | n.d.                                     |            |                  |                  |
|             | 2     | Binasal (E-E)    | [ I ] ≐ [ C ]                       | n.d.                       | n.d.                                     |            |                  |                  |
|             | 3     | ipsi-nasal (E-0) | n.d.                                | n.d.                       | n.d.                                     |            |                  |                  |
|             | 4     | ipsi-nasal (E-0) | n.d.                                | n.d.                       | n.d.                                     |            |                  |                  |
| #16         | 1     | Binasal (E-E)    | [ I ] ≐ [ C ]                       | n.d.                       | n.d.                                     |            |                  |                  |
| #17         | 1     | ipsi-nasal (E-0) | n.d.                                | N                          | n.d.                                     |            |                  |                  |
|             | 2     | Binasal (E-E)    | [ I ] > [ C ]                       | n.d.                       | 8                                        |            |                  |                  |
| #18         | 1     | ipsi-nasal (E-I) | n.d.                                | n.d.                       | n.d.                                     |            |                  |                  |
|             | 2     | Binasal (E-E)    | [ I ] > [ C ]                       | N                          | n.d.                                     |            |                  |                  |
| #19         | 1     | Binasal (E-E)    | [ I ] < [ C ]                       | n.d.                       | n.d.                                     |            |                  |                  |
|             | 2     | ipsi-nasal (E-0) | n.d.                                | n.d.                       | n.d.                                     |            |                  |                  |
|             | 3     | ipsi-nasal (E-0) | n.d.                                | n.d.                       | n.d.                                     |            |                  |                  |
|             | 4     | Binasal (E-E)    | [ I ] > [ C ]                       | n.d.                       | n.d.                                     |            |                  |                  |
|             | 5     | Binasal (E-E)    | [ I ] > [ C ]                       | n.d.                       | n.d.                                     |            |                  |                  |
|             | 6     | ipsi-nasal (E-0) | n.d.                                | n.d.                       | n.d.                                     |            |                  |                  |
| #20         | 1     | Binasal (E-E)    | [ I ] > [ C ]                       | n.d.                       | 8                                        |            |                  |                  |
|             | 2     | Binasal (E-E)    | [ I ] ≐ [ C ]                       | n.d.                       | 6                                        |            |                  |                  |
| #21         | 1     | Binasal (E-E)    | [ I ] ≐ [ C ]                       | n.d.                       | n.d.                                     |            |                  |                  |
| #22         | 1     | ipsi-nasal (E-0) | n.d.                                | n.d.                       | n.d.                                     |            |                  |                  |
| #23         | 1     | n.d.             | n.d.                                | Y                          | n.d.                                     |            |                  |                  |

Y; Yes, N; none, n.d.; not determined

Note: ※<sup>1</sup>; Averaged magnitude of responses to ipsi-nasal[I] and contra-nasal[C] stimulation.

※<sup>2</sup>; The boost-up of the responsiveness to contra-nasal odor stimulation after the ipsi-nostril obstruction.

※<sup>3</sup>; The number of bilateral odorant category matches (among 10 categories).
